# Supplementary material
Source: Springer Nature journal article supplement (https://www.springermedizin.de/resource/supplementary/12885_2009_1891_MOESM3_ESM.pdf/9461502)

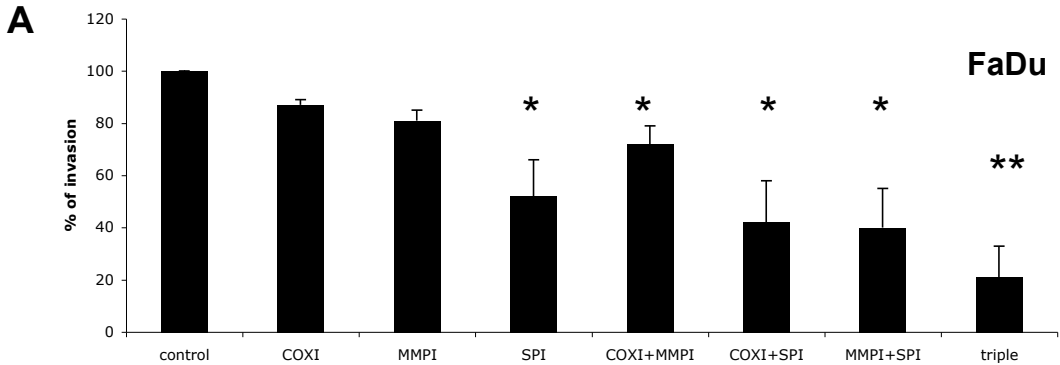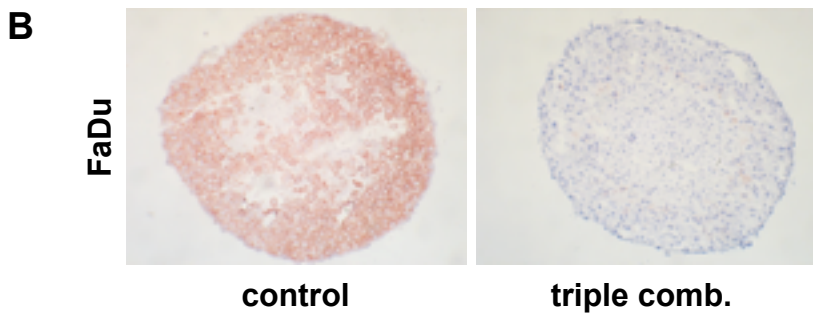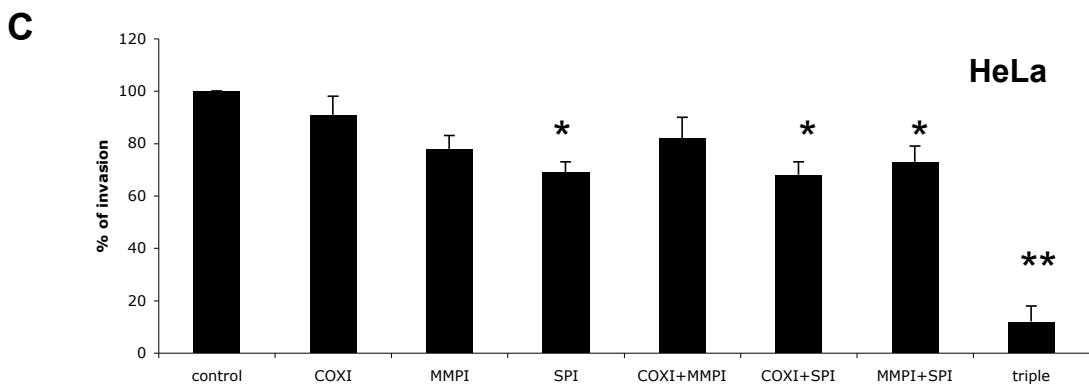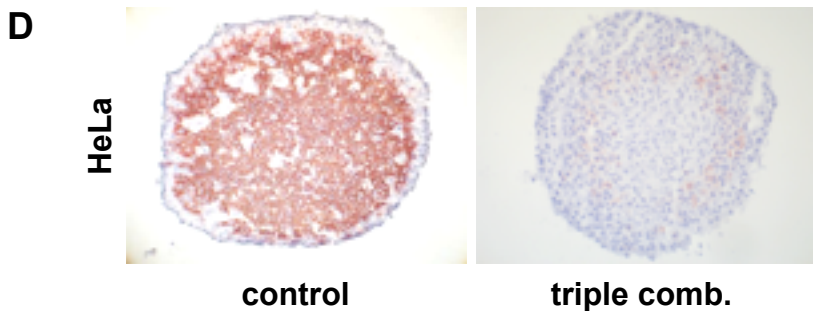

\*=p≤0,05  
 \*\*=p≤0,01

Supplement: MOESM3 [file 9461502]
